# Supplementary material for: A biomimetic molecular switch at work: coupling photoisomerization dynamics to peptide structural rearrangement
Source: Royal Society of Chemistry journal article supplement (doi:10.1039/c5cp07599h), 2016-01-01
Supplement: c5cp07599h2.pdf [file c5cp07599h2.pdf]

## Electronic Supplementary Information

### A Biomimetic Molecular Switch at Work: Coupling Photoisomerization Dynamics to Peptide Structural Rearrangement

*Cristina García-Iriepe,<sup>⊥‡</sup> Moussa Gueye,<sup>||</sup> Jérémie Léonard,<sup>\*||</sup> David Martínez-López,<sup>⊥</sup>  
Pedro J. Campos,<sup>⊥</sup> Luis Manuel Frutos,<sup>‡</sup> Diego Sampedro,<sup>\*⊥</sup> and Marco Marazzi,<sup>\*§†</sup>*

<sup>⊥</sup> Departamento de Química, Centro de Investigación en Síntesis Química (CISQ), Universidad de La Rioja, Madre de Dios 53, E-26006 Logroño, Spain

<sup>‡</sup> Unidad Docente de Química Física, Universidad de Alcalá, E-28871 Alcalá de Henares, Madrid, Spain

<sup>||</sup> Institut de Physique et Chimie des Matériaux de Strasbourg & Labex NIE, Université de Strasbourg, CNRS UMR 7504, 23 rue du Loess, Strasbourg 67034, France

<sup>§</sup> Department of Theoretical Chemical Biology, Institute of Physical Chemistry, KIT, Kaiserstrasse 12, 76131 Karlsruhe, Germany

#### **Contents:**

- 1. Experimental Methods**
- 2. Experimental Data.**
- 3. Computational Details.**
- 4. Electronic Transitions of the Simplified Compound 1.**
- 5. MD Analysis.**
- 6. Absorption Spectra of *E*-2-C1 and *E*-2-C2.**
- 7. Absorption Spectra Calibration: TD-DFT/MM vs. CASPT2/MM .**
- 8. Minimum Energy Paths for *E*-2-C1 and *E*-2-C2.**
- 9. CASPT2//CASSCF Energy Profile of Compound 1, *E*-2-C1 and *E*-2-C2 in H<sub>2</sub>O.**
- 10. Cartesian Coordinates of the Most Relevant Optimized Structures.**

## 1. Experimental Methods

The TAS set-up is based on a Ti:sapphire generative amplifier laser system, delivering 800 nm, 40 fs pulses at a repetition rate of 5 kHz. A fraction of this fundamental pulse is used for second harmonic generation (SHG in a BBO crystal) to generate a 400-nm pump beam. Another fraction is used to produce a white light probe pulse (supercontinuum generation in CaF<sub>2</sub>) covering a spectral range from 290 to > 950 nm. The time delay between pump and probe pulses are adjusted by a stepper motor ("delay line"). The relative linear polarizations of pump and probe beams are set to magic angle (54.7°). The experimental time resolution is ~ 70 fs. The pump intensity is kept in the linear regime of excitation in order to promote the sample to its first excited state (S<sub>1</sub>) with a few-percent probability. Both pump and probe beams are focused into a 0.2-mm thick flow cell containing the sample in solution. A peristaltic pump circulates the sample to refresh it between two excitation laser shots. The sample optical density (OD) at the excitation wavelength (400 nm) is 0.3 for compound **1** and 0.05 for compound **2**. For temperature-dependent studies, a thin (1 mm in diameter) temperature gauge was immersed inside the sample reservoir (4 mL), itself inserted in a temperature-stabilized water bath. Quantitative kinetic analysis of the TAS experiments is done by global analysis of the TAS 2D-maps. Singular values decomposition (SVD) is performed for data reduction, and the dominating three singular transients are fitted simultaneously to multiexponential decaying functions convoluted with a Gaussian function representing the instrument response function. Irrespective of the temperatures, the minimal number of time constants required to make a satisfying global fit is of four in the case of **E-1** and five for the cross-linked peptide. The results of the global analysis may be disclosed by plotting the Decay-Associated Spectra (DAS) which reveal the wavelength dependence of the pre-exponential amplitudes associated to each decay time constant.

## 2. Experimental Data.

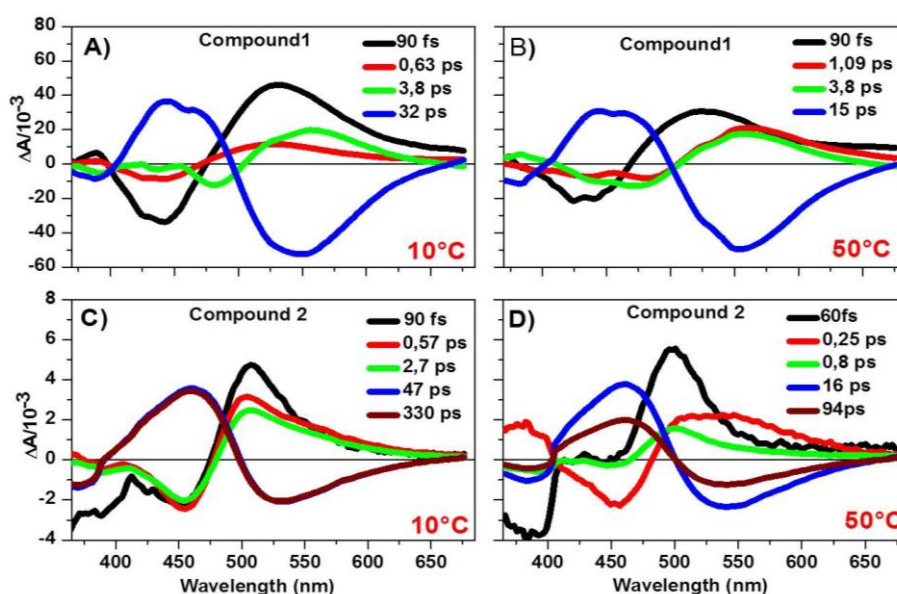

Figure S1: Temperature dependence of the Decay-Associated Spectra (DAS) obtained by global analysis of TAS data of compound **1** (A) at 10°C, (B) at 50°C, and compound **2** (C) at 10°C, (D) 50°C.

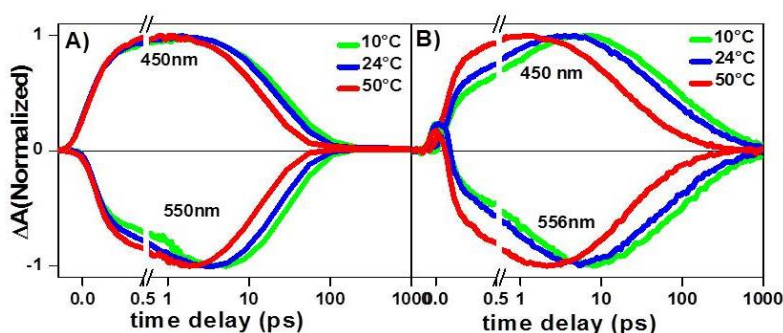

Figure S2: Temperature dependence of the kinetic traces at 450 nm (ESA band, positive curves) and 550 nm (SE band, negative curves) of (A) E-1 and (B) E-2. For compound E-2 (panel B) both the  $S_1$  population relaxation (build up of the signals until their maxima) and  $S_1$  population decay accelerate at higher temperatures.

The temperature dependence of the  $S_1$  decay time constants ( $\tau_4$  and  $\tau_5$ ) of compounds **1** and **2** are analyzed with an Arrhenius law which assumes:  $1/\tau = Ae^{-E_A/k_B T}$ , with A a pre-exponential factor,  $E_A$  the activation energy,  $k_B$  the Boltzmann constant. Figure S3 presents the plots of  $\ln(\tau)$  as a function of  $1/T$  and Table S1 presents the results of the linear fits.

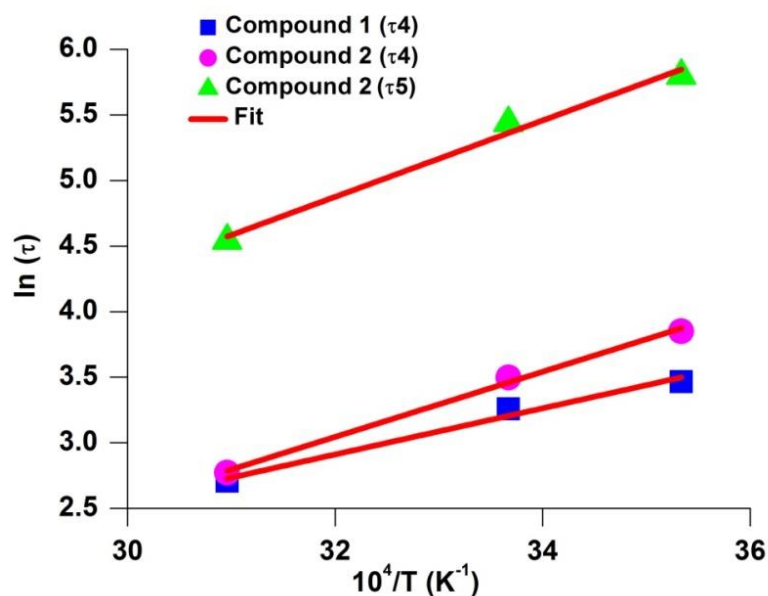

Figure S3: Arrhenius plot ( $\ln(\tau)$  as a function of  $1/T$ ) illustrating the temperature dependence of the  $S_1$  lifetimes of compound **1** ( $\tau_4$ ), and of **2** ( $\tau_4$  and  $\tau_5$ ). Red lines are linear fits (see Table S1).

Table S1. Result of the linear fit of the Arrhenius plots above (Figure S3).

|                                 | Compound <b>1</b> , $\tau_4$ | Compound <b>2</b> , $\tau_4$ | Compound <b>2</b> , $\tau_5$ |
|---------------------------------|------------------------------|------------------------------|------------------------------|
| A (ps <sup>-1</sup> )           | 15 (7 to 30)                 | 130 (80 to 220)              | 85 (30 to 220)               |
| $E_A/k_B$ (K)                   | 1760 +/- 200                 | 2480 +/- 150                 | 2910 +/- 300                 |
| $E_A$ (kcal·mol <sup>-1</sup> ) | 3.5                          | 4.9                          | 5.8                          |

### 3. Computational Details.

In order to study the peptide conformational changes, the bare peptide and the cross-linked peptide (compounds **E-2** and **Z-2**) were placed in a cubic box with side length 67.6913 Å, 66.8257 Å and 66.7747 Å, respectively. Then, the boxes were filled with water molecules represented by the TIP3P model<sup>1</sup> (10140, 9709 and 9696 water molecules, respectively).

We used the AMBER99SB force field<sup>2</sup> for the peptide and the generalized AMBER force field (GAFF<sup>3</sup>) for the switch. Because of the thermal stability of separated *E* and *Z* isomers at 300 K,<sup>4</sup> charges have been calculated for both *E* and *Z* isolated molecules at the Hartree–Fock level of theory in the framework of the Merz–Singh–Kollman scheme,<sup>5,6</sup> after geometry optimization with the B3LYP<sup>7</sup> functional. The generated MM switch parameters were validated by calculating a scan around the isomerizable formal double bond at the GAFF and MP2 level (see Figure S4). Moreover, a chloride anion was added to get a neutralized system.

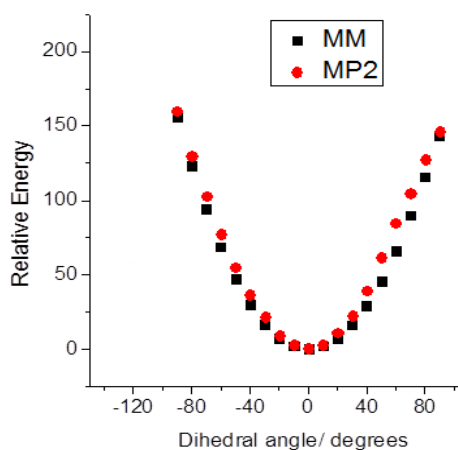

Figure S4. Ground state energy scan around the isomerizable C=C double bond (*E* isomer) at the MM and MP2 level of theory.

Regarding compound **1** in MeOH, the model system was placed in a cubic box of initial size  $4.699 \times 4.699 \times 4.699$  Å containing 395 solvent molecules. The switch was treated as previously described and again, a chloride anion was added to electroneutralize the model. For comparison with ultrafast spectroscopy experiments, a simplified model of **1** was embedded in an explicit cubic box of MeOH molecules. The simplification consists in replacing the <sup>t</sup>Bu group of each BOC (*tert*-butoxycarbonyl) moiety with a methyl group. This structural modification reduces the computational time and should have almost no effect on the photochemistry since the chromophore stays intact. Again, the switch has been represented by the GAFF, while methanol molecules are modeled by a force field developed by Dang et al.<sup>45</sup> Since the interest related to the photoswitch **1** in MeOH concerns mainly its photochemistry (*i.e.* no conformational study is needed), this model was equilibrated in the canonical (NVT) and isothermal-isobaric (NPT) ensembles (300 K, 1 atm) without calculating additional MD trajectories.

All studied systems were first equilibrated in the isotherm (NVT) and isobar (NPT) ensembles to reach a temperature of 300 K and a pressure of 1 atm, before running the production dynamics (not required for compound **1**).

The optimized model **1** and 50 MD snapshots of the **E-2** and **Z-2**, were extracted to calculate the electronic vertical transitions at the time dependent (TD-)DFT/MM level of theory, after calibration with the multiconfigurational MS-CASPT2//SA-2-CASSCF/MM level of theory. The selected criterion to extract MD snapshots was the sulphur-sulphur distance (spanning *ca.* 10 Å for both isomers), which was found to be of particular relevance for conformational analysis. Finally, the absorption spectra were built as a convolution of Gaussian functions.

QM/MM models were built for the simplified compound **1** and compound **2**. More precisely, while the QM/MM frontier does not involve any covalent bond for the simplified compound **1** (the switch is entirely in the QM region, surrounded by MeOH solvent molecules in the MM region), two hydrogen link atoms (HLAs) are needed to treat the boundaries between the switch and the rest of the peptide on compound **2**. The HLAs are therefore placed along the C-C single bonds connecting the cysteine residues to the C=O moieties of the switch (see Figure 1B in the main text), and the Morokuma scheme is applied to keep the HLAs aligned during QM/MM optimizations and non-adiabatic dynamics.<sup>8</sup>

Combined with the molecular mechanics force field, the Møller–Plesset perturbation theory to the 2<sup>nd</sup> order (MP2) was used to optimize structures on the electronic ground state. The MP2/MM optimized structures of model **1** and of two most significant **E-2** conformers, were considered as starting geometries for the calculation of the *E*-to-*Z* minimum energy paths (MEPs) at the SA-2-CASSCF level. Along the MEP calculations, a radius of 15 Ångstroms around the molecular switch (QM region) is allowed to optimize at the MM level, including water molecules, peptide backbone and side chains.

The State Averaged-Complete Active Space Self Consistent Field (SA2-CASSCF) was used to calculate minimum energy paths and non-adiabatic dynamics, including the electronic ground state and the first two excited states, averaged with equal weights. The active space selected was 12 electrons in 12 orbitals (see Figure S5). The step size used in the MEP simulations was 0.1 a.u. (in normalized mass-weighted coordinates) for all calculations. The conical intersections were characterized by calculating the non-adiabatic coupling vectors (i.e. derivative coupling (DC) and gradient difference (GD) vectors), in order to determine the  $S_1/S_0$  crossing topology. The Multi State-Complete Active Space Perturbation Theory to the 2<sup>nd</sup> order (MS-CASPT2) method was used to correct the SA-CASSCF energies, including an imaginary shift of 0.2 and no IPEA shift.

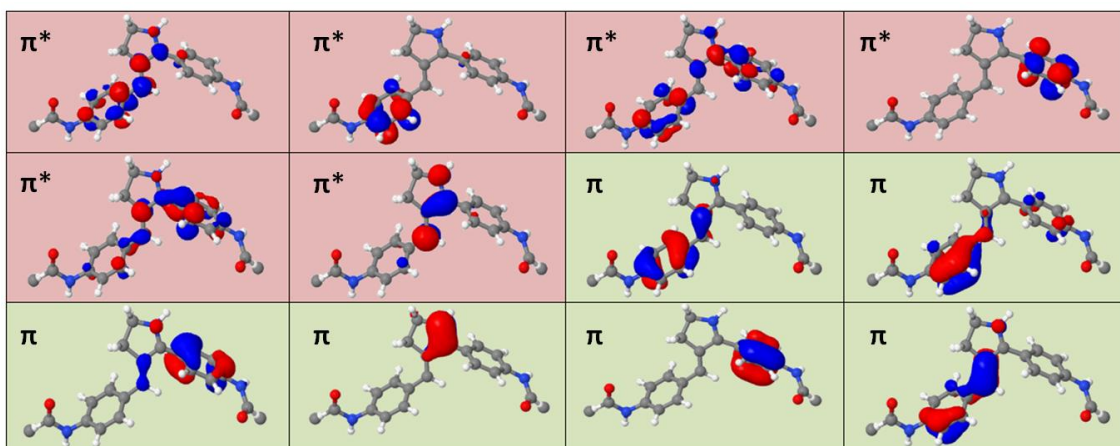

Figure S5.  $\pi^*$  and  $\pi$  orbitals included in the active space used for CASSCF and CASPT2 calculations.

#### 4. Electronic Transitions of the Simplified Compound 1.

The optical bright state is the first singlet excited state  $S_1$ . The excitation energies calculated for both, the equilibrated (NVT and NPT) and the  $S_0$  optimized structures (after equilibration), are in very good agreement with the experimental one (Table S2). The electronic transition is described by the excitation of one electron from the HOMO to the LUMO (see Figure S6). The HOMO orbital is a  $\pi$  orbital centered in the photoisomerizable CC double bond and also on one phenyl ring. Whereas, the LUMO is a  $\pi^*$  orbital centered in the same CC double bond and partially in the C=N bond of the five membered ring.

Table S2. CASPT2/MM and TD-DFT/MM vertical transitions energies, electronic nature and oscillator strengths ( $f$ ) for the switch in MeOH.

|                        | Level of theory                   | State                         | $E_{\text{CASPT2}} / \text{eV (nm)}$ | $f$    |
|------------------------|-----------------------------------|-------------------------------|--------------------------------------|--------|
| Optimized structure    | CASPT2 (12,12)/AMBER 6-31G*       | $S_1 (\pi \rightarrow \pi^*)$ | 3.09 (401)                           | 1.1346 |
| Equilibrated Structure | CASPT2 (12,12)/AMBER 6-31G*       | $S_1 (\pi \rightarrow \pi^*)$ | 3.12 (398)                           | 0.9897 |
|                        | TD-DFT/AMBER 6-311+G(d,p) (M062X) | $S_1 (\pi \rightarrow \pi^*)$ | 3.24 (383)                           | 1.2479 |

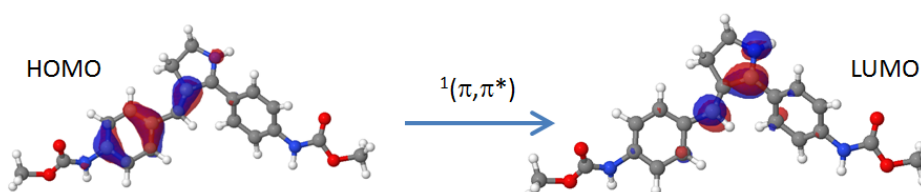

Figure S6. CASSCF molecular orbitals describing the electronic nature of the optically bright state of compound 1.

## 5. MD Analysis.

As described in the main text, 10 MD simulations were run for compounds **E-2** and **Z-2**. Some key parameters were analyzed for each trajectory as the SS distance and the distribution of the dihedral angles  $\varphi_E$  and  $\varphi_Z$ . The first parameter is important in order to measure the change in end-to-end length of the photoswitch after isomerization. Regarding the dihedral analysis, we check that both isomers do not interconvert along the simulation, that is, no thermal isomerization is taking place. We select one representative simulation to illustrate these analyses. The SS distance and the  $\varphi_E$  and  $\varphi_Z$  distributions are shown in Figures S7 respectively.

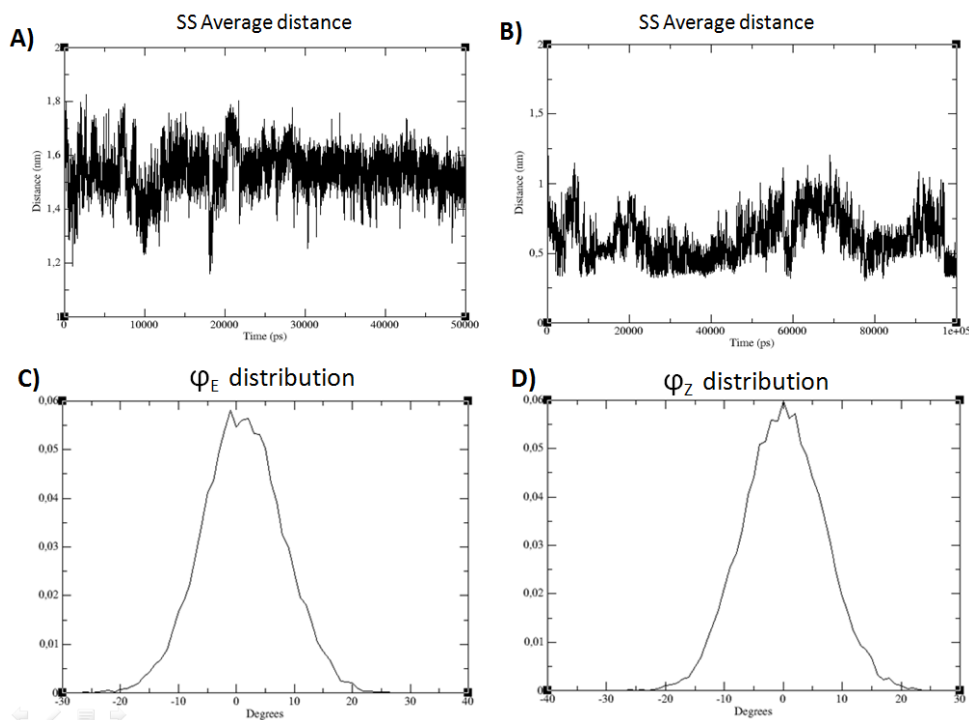

Figure S7. SS average distance analysis along time (50 ns, corresponding to one of the 10 MD simulations performed) for the peptide cross-linked with the A) *E* isomer and B) *Z* isomer. Distribution of one of the dihedral angles involved in the photoisomerization for the peptide cross-linked with the C) *E* isomer and D) *Z* isomer.

Then, a cluster analysis for the bare peptide and the peptide cross-linked with the *E* isomer was performed in order to check the system heterogeneity in the ground state. With this aim, average structures of the peptide conformations were calculated using the "g\_cluster" tool of GROMACS. The gromos method and a backbone root mean square deviation (RMSD) cutoff of 0.47 nm were selected. With these criteria, 31 and 39 clusters were found respectively but, in both cases, only two of them are the main ones (population >10%, Table S3). Moreover, for both systems one cluster structure is characterized by a larger SS average distance (see Table S3).

Table S3. Cluster analysis for the bare peptide and the *E* isomer cross-linked peptide. The number of structures, percentage and SS average distance are detailed.

| System                                      | Nº Cluster | Nº Structures | %  | SS average distance (Å) |
|---------------------------------------------|------------|---------------|----|-------------------------|
| <b>Bare peptide</b>                         | 1          | 8954          | 55 | 16.0                    |
|                                             | 2          | 3256          | 20 | 14.4                    |
|                                             | 3          | 1302          | 8  | 16.4                    |
|                                             | 4          | 847           | 5  | 16.8                    |
|                                             | 5          | 423           | 2  | 17.5                    |
|                                             | 6          | 286           | 2  | 19.9                    |
|                                             | 7          | 248           | 1  | 19.5                    |
|                                             | 8          | 197           | 1  | 22.3                    |
|                                             | 9          | 177           | 1  | 11.3                    |
| <b><i>E</i> isomer cross-linked peptide</b> | 1          | 8140          | 50 | 14.7                    |
|                                             | 2          | 2605          | 16 | 11.5                    |
|                                             | 3          | 1139          | 7  | 13.3                    |
|                                             | 4          | 746           | 4  | 15.5                    |
|                                             | 5          | 561           | 3  | 11.0                    |
|                                             | 6          | 513           | 3  | 16.6                    |
|                                             | 7          | 419           | 2  | 14.0                    |
|                                             | 8          | 334           | 2  | 11.3                    |
|                                             | 9          | 332           | 2  | 17.0                    |
|                                             | 10         | 261           | 1  | 14.9                    |
|                                             | 11         | 170           | 1  | 13.6                    |

## 6. Absorption Spectra of *E*-2-C1 and *E*-2-C2.

The *E* isomer ground state is structurally heterogeneous and two main conformations have been found (see MD analysis), denoted cluster 1 (C1) and cluster 2 (C2). We have simulated the absorption spectra for different snapshots of each cluster at the MS-CASPT2//SA2-CASSCF/MM level of theory. The optically bright state is the first singlet excited state  $S_1$ . The spectra of both clusters are shown in Figure S8. They are nearly identical, equally broad, and centered around 380-390nm, indicating that both clusters are not spectroscopically distinguishable. The experimental spectrum shows a broad band with its maximum around 375 nm.



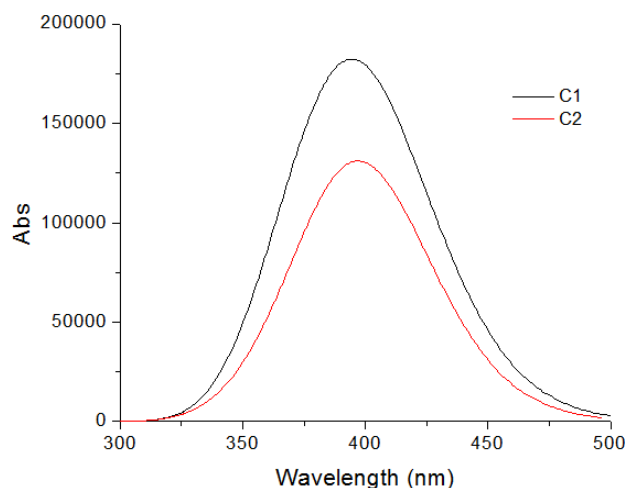

Figure S8. Absorption spectra simulated for both clusters, C1 and C2 of the *E* isomer.

## 7. Absorption Spectra Calibration: TD-DFT/MM vs. CASPT2/MM .

We simulated the absorption spectrum for 10 snapshots of each the *E* and the *Z* isomer cross linked peptide (20 snapshots total) at the MS-CASPT2//SA2-CASSCF/MM level of theory. This method is computationally expensive so we use it as a benchmark to assess the accuracy of the spectra computed from the same snapshots at the TD-DFT/MM level of theory using the M062X functional. The results are displayed in Figure S9. At the TDDFT/MM level, both spectra are blue shifted of around 20 nm but, the nature of the electronic transition and the relative intensities are in agreement. Therefore, we decided to increase the statistic up to 50 snapshots for each system and calculate the spectra at the TDDFT/MM level of theory, computationally less expensive (Figure 2C in the main text).

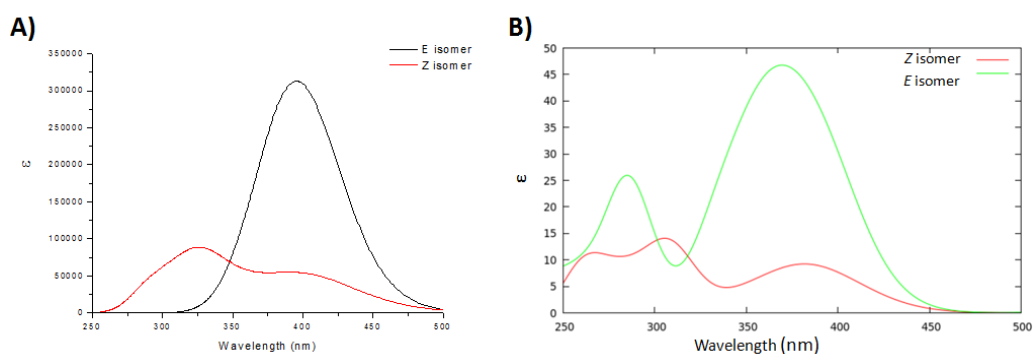

Figure S9. Absorption spectra of 10 snapshots for the *E* and *Z* isomer cross linked peptide at the A) MS-CASPT2//SA2-CASSCF/MM and B) TD-DFT/MM level of theory.

## 8. Minimum Energy Paths for *E*-2-C1 and *E*-2-C2.

The minimum energy paths were calculated for C1 and C2 at the SA2-CASSCF(12,12)/MM. The photochemistry of both clusters is found to be very similar. From the Franck–Condon structure the system minimizes the energy by activation of the stretching mode (elongation of the C=C bond) reaching an almost planar minimum in  $S_1$  (Figure S10). From there, the system has to

overcome an energy barrier of 8.48 and 5.22 kcal·mol<sup>-1</sup> at the SA2-CASSCF/MM level of theory. Once reached the TS structure the system can evolve minimizing the energy along the torsion coordinate upon reaching the conical intersection with the ground state, S<sub>0</sub>. Two main paths are possible after the decay to the ground state, internal conversion of photoproduct formation (Figure S11).

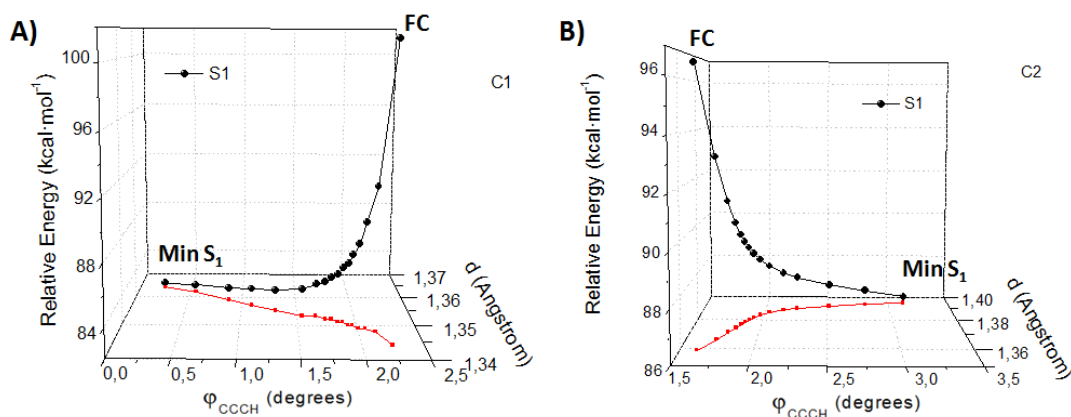

Figure S10. MEP from the FC structure to the minimum in S<sub>1</sub> for A) *E*-2-C1 and B) *E*-2-C2.

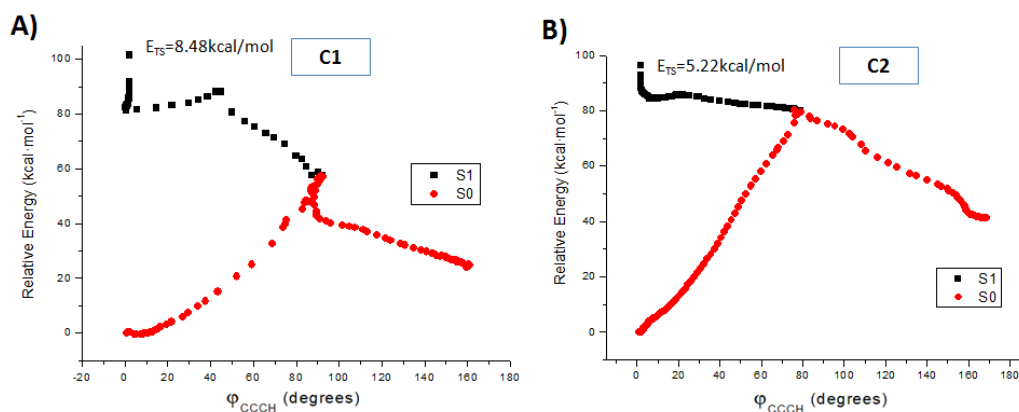

Figure S11. Minimum energy paths for A) *E*-2-C1 and B) *E*-2-C2.

Moreover, the structural changes of the C1 conformer along the MEP, including the effects on the amino acids in the vicinity of the molecular switch, are shown in Figure S12.

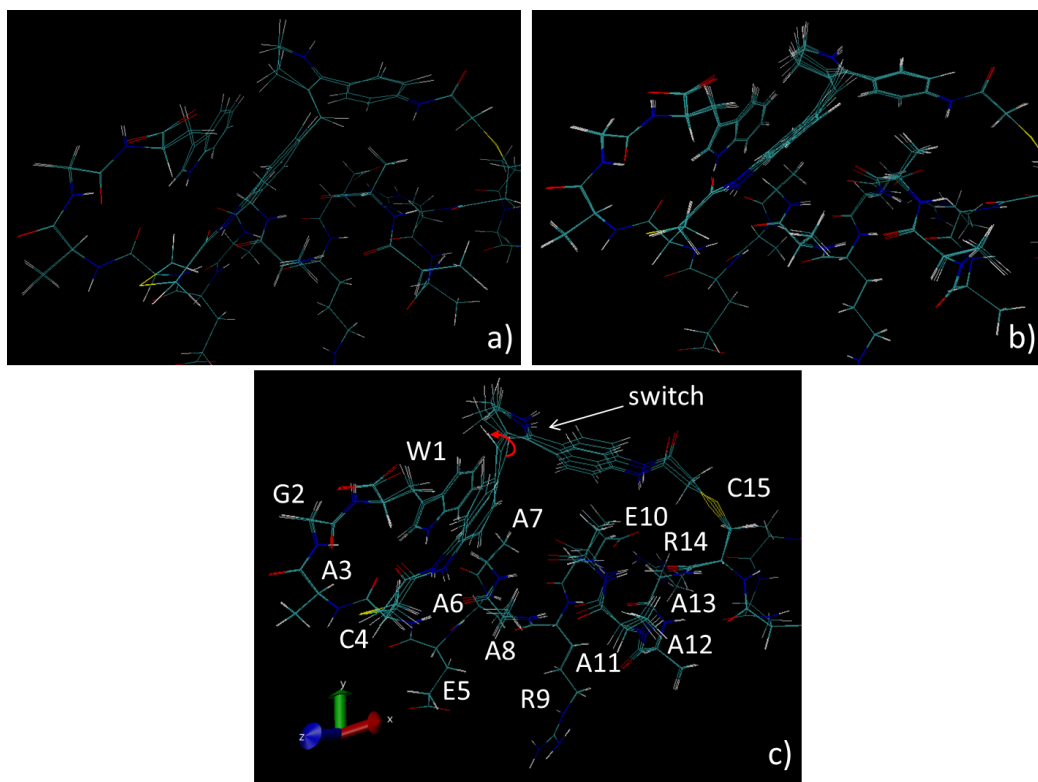

Figure S12. Structural changes of the C1 conformer along the calculated MEP, including the molecular switch and the first 15 amino acids of the peptide sequence: a) from  $S_1$  minimum to  $S_1$  TS; b) from  $S_1$  TS to  $S_1/S_0$  CI; c) photoisomerization path from  $S_0 \rightarrow S_1$  vertical excitation to  $S_1/S_0$  CI. The red arrow indicates the isomerizing bond.

Finally, a structural comparison between E-1, E-2-C1 and E-2-C2 is given in Table S4, in terms of the main geometrical parameters of the molecular switch along the  $S_1$  pathway.

Table S4. Structural comparison between E-1, E-2-C1 and E-2-C2 along the photoreaction pathway.

|                                                          | <b>E-1</b>               |           |          | <b>E-2-C1</b>             |           |          | <b>E-2-C2</b>            |           |          |
|----------------------------------------------------------|--------------------------|-----------|----------|---------------------------|-----------|----------|--------------------------|-----------|----------|
|                                                          | $S_1$ FC                 | $S_1$ min | $S_1$ TS | $S_1$ FC                  | $S_1$ min | $S_1$ TS | $S_1$ FC                 | $S_1$ min | $S_1$ TS |
| $d_{C-C} - d_{C=C} (\text{\AA})^{i)}$                    | 0.11                     | 0.002     | -0.04    | 0.14                      | 0.11      | 0.03     | 0.09                     | 0.05      | -0.06    |
| $\phi_{CCCC} (^{\circ})$                                 | 2.9                      | 7.7       | 16.3     | 1.5                       | 4.2       | 35       | 11.4                     | 13.0      | 40       |
| $\phi_{CCCH} (^{\circ})$                                 | -0.4                     | 1.9       | 30       | 2.2                       | 0.2       | 45       | 1.6                      | 3.1       | 20       |
| Pyramidalization of the PSB nitrogen atom ( $^{\circ}$ ) | 2.6                      | 12.2      | 11.2     | 2.1                       | 0.7       | 45       | 4.8                      | 13.2      | 25       |
| Charge transfer character <sup>ii)</sup>                 | 0.59                     | 0.60      | 0.57     | 0.83                      | 0.88      | 0.88     | 0.68                     | 0.67      | 0.52     |
| $S_1$ energy barrier <sup>ii)</sup>                      | 3 kcal·mol <sup>-1</sup> |           |          | 13 kcal·mol <sup>-1</sup> |           |          | 5 kcal·mol <sup>-1</sup> |           |          |
| $S_0$ SS average distance ( $\text{\AA}$ )               | -                        |           |          | 14.7                      | -         | -        | 11.5                     | -         | -        |

<sup>i)</sup> the difference between single and double bond lengths quantifies the so-called “Bond Length Alternation” (BLA) deformation: when this becomes  $<0$ , the double bond acquires single bond character which enables torsional motion around  $\phi_{CCCC}$ .

<sup>ii)</sup> the charge transfer character is calculated by splitting the chromophore in two fragments at the vinyl CH moiety (see Figure 2D). The numbers in that line of the table are the charge predicted to sit on the six-membered ring directly bound to the photoisomerizable  $C=C$  bond.

iii) predicted from the 1D (E-1) or 2D (E-2, see figure 9) PES sampling at the CASPT2 level, see below.

## 9. CASPT2//CASSCF Energy Profile of the Molecular Switch in MeOH, C1 and C2 in H<sub>2</sub>O.

Single point energy corrections at the MS-CASPT2 level have been done along the minimum energy path calculated at the SA2-CASSCF/MM level of theory for the three systems under study: *E* isomer in MeOH and the *E* and *Z* isomer cross-linked peptide in water. As observed in Figure S13, a good agreement between CASSCF and CASPT2 relative energies and TS energies is found.

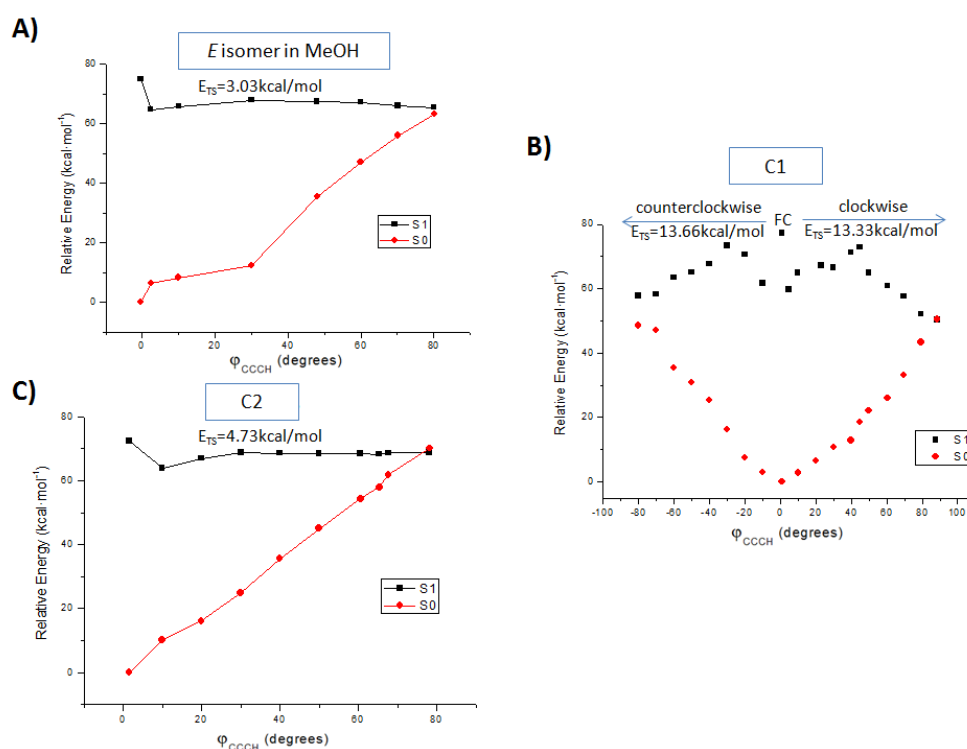

Figure S13. CASPT2 single energy corrections along the CASSCF minimum energy paths of the A) *E* isomer in MeOH, B) *E-2-C1* and C) *E-2-C2*.

## 10. Cartesian Coordinates of the Most Relevant Optimized Structures.

| FC STRUCTURE E-1 |          |          |          |
|------------------|----------|----------|----------|
| C                | 9.20342  | -1.40876 | 2.67527  |
| H                | 8.99285  | -2.11418 | 3.46586  |
| H                | 9.48754  | -1.94103 | 1.77917  |
| H                | 9.98752  | -0.73293 | 2.97513  |
| O                | 8.06971  | -0.59306 | 2.42904  |
| C                | 6.97153  | -1.19677 | 2.00516  |
| O                | 6.87976  | -2.37161 | 1.80799  |
| N                | 5.99135  | -0.27056 | 1.83716  |
| H                | 6.24107  | 0.65568  | 2.10482  |
| C                | 4.67054  | -0.46183 | 1.41829  |
| C                | 4.19497  | -1.63723 | 0.85163  |
| C                | 2.87889  | -1.72813 | 0.43930  |
| H                | 2.56352  | -2.64928 | -0.00534 |
| H                | 4.85078  | -2.47345 | 0.73273  |
| C                | 3.80062  | 0.62657  | 1.55379  |
| H                | 4.15526  | 1.55027  | 1.97264  |
| C                | 2.48337  | 0.52257  | 1.14830  |
| H                | 1.83932  | 1.37543  | 1.26150  |
| C                | 1.98476  | -0.65994 | 0.58050  |
| C                | 0.57762  | -0.65815 | 0.17120  |
| H                | 0.05947  | 0.24415  | 0.43769  |
| C                | -0.15899 | -1.57897 | -0.49047 |
| C                | 0.19185  | -2.96904 | -0.99749 |
| H                | 0.86838  | -2.91336 | -1.84129 |
| H                | 0.65489  | -3.57359 | -0.23265 |
| C                | -1.15834 | -3.57883 | -1.41358 |
| H                | -1.50025 | -4.35749 | -0.74699 |
| H                | -1.18316 | -3.94551 | -2.42718 |
| N                | -2.07695 | -2.43673 | -1.30574 |
| H                | -3.02432 | -2.48161 | -1.63366 |
| C                | -1.57007 | -1.35743 | -0.80962 |
| C                | -2.38705 | -0.14325 | -0.64673 |
| C                | -1.92898 | 1.09354  | -1.10905 |
| C                | -2.77092 | 2.19459  | -1.07228 |
| H                | -2.42599 | 3.13738  | -1.44933 |
| H                | -0.95170 | 1.19318  | -1.54124 |
| C                | -3.68046 | -0.23535 | -0.12025 |
| H                | -4.03247 | -1.16733 | 0.28022  |
| C                | -4.51068 | 0.85950  | -0.07123 |
| H                | -5.49671 | 0.76897  | 0.33371  |
| C                | -4.06925 | 2.08594  | -0.56818 |
| N                | -4.86515 | 3.23591  | -0.56216 |
| H                | -4.39860 | 4.11495  | -0.59816 |
| C                | -6.21972 | 3.27882  | -0.70424 |
| O                | -6.94304 | 2.33132  | -0.76234 |
| O                | -6.61474 | 4.53526  | -0.77354 |
| C                | -8.00234 | 4.76652  | -0.98247 |
| H                | -8.29274 | 4.41992  | -1.96261 |
| H                | -8.58943 | 4.26139  | -0.23230 |
| H                | -8.12838 | 5.83308  | -0.90794 |

---

MINIMUM  $S_1$  E-1

---

|   |             |             |             |
|---|-------------|-------------|-------------|
| C | 9.19432000  | -1.30633000 | 2.73441000  |
| H | 9.00868000  | -2.11668000 | 3.42506000  |
| H | 9.52506000  | -1.69616000 | 1.78226000  |
| H | 9.92106000  | -0.62195000 | 3.13896000  |
| O | 8.00622000  | -0.53466000 | 2.56256000  |
| C | 6.96496000  | -1.12872000 | 2.03417000  |
| O | 6.90800000  | -2.25503000 | 1.66274000  |
| N | 5.91964000  | -0.21723000 | 1.99381000  |
| H | 6.14322000  | 0.67706000  | 2.37908000  |
| C | 4.67718000  | -0.36679000 | 1.47843000  |
| C | 4.21989000  | -1.52591000 | 0.80721000  |
| C | 2.94290000  | -1.58024000 | 0.34935000  |
| H | 2.64373000  | -2.45022000 | -0.19667000 |
| H | 4.89054000  | -2.34218000 | 0.64661000  |
| C | 3.78929000  | 0.74471000  | 1.63441000  |
| H | 4.15095000  | 1.64472000  | 2.09502000  |
| C | 2.49798000  | 0.67037000  | 1.18567000  |
| H | 1.85157000  | 1.51757000  | 1.30902000  |
| C | 1.99298000  | -0.50679000 | 0.54855000  |
| C | 0.62572000  | -0.51973000 | 0.16297000  |
| H | 0.09830000  | 0.37973000  | 0.41263000  |
| C | -0.15008000 | -1.50603000 | -0.49880000 |
| C | 0.23024000  | -2.93490000 | -0.86008000 |
| H | 0.86095000  | -2.94506000 | -1.74432000 |
| H | 0.75984000  | -3.44156000 | -0.06534000 |
| C | -1.11620000 | -3.63089000 | -1.14212000 |
| H | -1.39454000 | -4.29793000 | -0.33100000 |
| H | -1.10549000 | -4.20852000 | -2.05787000 |
| N | -2.04539000 | -2.52820000 | -1.23942000 |
| H | -2.91645000 | -2.60228000 | -1.71702000 |
| C | -1.52016000 | -1.32956000 | -0.85870000 |
| C | -2.36849000 | -0.15322000 | -0.74946000 |
| C | -1.91266000 | 1.13934000  | -1.06670000 |
| C | -2.77571000 | 2.22190000  | -1.02306000 |
| H | -2.41581000 | 3.19794000  | -1.28924000 |
| H | -0.90694000 | 1.29401000  | -1.41001000 |
| C | -3.71702000 | -0.28922000 | -0.36806000 |
| H | -4.08841000 | -1.25637000 | -0.09016000 |
| C | -4.57198000 | 0.78584000  | -0.30821000 |
| H | -5.59084000 | 0.64410000  | -0.01256000 |
| C | -4.11351000 | 2.05755000  | -0.64686000 |
| N | -4.92183000 | 3.20137000  | -0.60709000 |
| H | -4.45818000 | 4.08117000  | -0.56351000 |
| C | -6.26669000 | 3.26016000  | -0.79819000 |
| O | -6.99957000 | 2.32927000  | -0.94162000 |
| O | -6.65472000 | 4.52476000  | -0.80144000 |
| C | -8.03521000 | 4.77281000  | -1.02311000 |
| H | -8.31328000 | 4.46967000  | -2.02120000 |
| H | -8.63792000 | 4.24084000  | -0.30374000 |
| H | -8.15802000 | 5.83594000  | -0.90581000 |

---

TS S<sub>1</sub> E-1

---

|   |             |             |             |
|---|-------------|-------------|-------------|
| C | 9.18155200  | -1.22689100 | 2.59737500  |
| H | 9.03594900  | -2.09055500 | 3.22770700  |
| H | 9.49513000  | -1.53431700 | 1.61209200  |
| H | 9.90257500  | -0.55776500 | 3.03451200  |
| O | 7.97141300  | -0.47717300 | 2.51633800  |
| C | 6.93660300  | -1.05265800 | 1.95518900  |
| O | 6.90343100  | -2.14632400 | 1.49643000  |
| N | 5.86755600  | -0.17203300 | 2.01028100  |
| H | 6.06554100  | 0.68050300  | 2.49072300  |
| C | 4.61905300  | -0.31046100 | 1.50110000  |
| C | 4.20025700  | -1.39116600 | 0.68932800  |
| C | 2.91386600  | -1.45087200 | 0.25900000  |
| H | 2.63527100  | -2.25489700 | -0.38910500 |
| H | 4.90469600  | -2.14153900 | 0.40268300  |
| C | 3.68948300  | 0.72937900  | 1.81912900  |
| H | 4.02280000  | 1.57924800  | 2.38335700  |
| C | 2.38621200  | 0.63815400  | 1.42167800  |
| H | 1.69858700  | 1.41786300  | 1.68825400  |
| C | 1.91495300  | -0.47963200 | 0.65362900  |
| C | 0.53747100  | -0.56730700 | 0.38500000  |
| H | -0.06642800 | 0.14677300  | 0.91311600  |
| C | -0.21165700 | -1.58294600 | -0.32685200 |
| C | 0.20763300  | -2.99545400 | -0.69946000 |
| H | 0.88992100  | -2.98170100 | -1.54627200 |
| H | 0.69097300  | -3.52191800 | 0.11144800  |
| C | -1.11843500 | -3.66921900 | -1.09851100 |
| H | -1.49737600 | -4.29865700 | -0.29900200 |
| H | -1.03319100 | -4.27384200 | -1.99007300 |
| N | -2.00471500 | -2.54725800 | -1.31683100 |
| H | -2.81518100 | -2.60130800 | -1.89222500 |
| C | -1.49940200 | -1.36729700 | -0.86596900 |
| C | -2.34718900 | -0.18039800 | -0.79219000 |
| C | -1.85544800 | 1.11265800  | -1.02877700 |
| C | -2.70786700 | 2.20411100  | -0.99981300 |
| H | -2.32068100 | 3.18397100  | -1.20451800 |
| H | -0.82313400 | 1.26637200  | -1.28094600 |
| C | -3.71451900 | -0.31457500 | -0.50050900 |
| H | -4.11220800 | -1.28646000 | -0.28501800 |
| C | -4.56040800 | 0.76989000  | -0.44708400 |
| H | -5.59563900 | 0.63078500  | -0.21721100 |
| C | -4.06861200 | 2.04487200  | -0.71055800 |
| N | -4.86315900 | 3.19784800  | -0.67861900 |
| H | -4.39138800 | 4.07175400  | -0.60838900 |
| C | -6.20902700 | 3.27598100  | -0.85781200 |
| O | -6.95355400 | 2.35698800  | -1.01811400 |
| O | -6.58370600 | 4.54404100  | -0.82943800 |
| C | -7.96269200 | 4.81088000  | -1.04053200 |
| H | -8.24892700 | 4.52918900  | -2.04222600 |
| H | -8.56872000 | 4.27182200  | -0.32943700 |
| H | -8.07438100 | 5.87330300  | -0.90395300 |

---

FC STRUCTURE E-2-C1

---

|   |             |             |             |
|---|-------------|-------------|-------------|
| C | 33.01085700 | 39.55380500 | 35.91936900 |
| C | 18.55260200 | 36.71233600 | 39.09524800 |
| C | 19.83638600 | 37.38397300 | 39.50205700 |
| O | 20.23072000 | 37.32112000 | 40.63159300 |
| N | 20.45220000 | 38.01458600 | 38.47505000 |
| C | 21.63144800 | 38.77729900 | 38.43527700 |
| C | 21.95996700 | 39.35259900 | 37.21498200 |
| C | 22.47367700 | 38.96735900 | 39.53474300 |
| C | 23.62654900 | 39.73540200 | 39.37825000 |
| C | 23.96400400 | 40.30433600 | 38.14384200 |
| C | 23.11066500 | 40.09507800 | 37.05702500 |
| C | 25.20171600 | 41.11289600 | 37.96355400 |
| C | 25.38323100 | 42.34762700 | 38.46185900 |
| C | 24.46508100 | 43.20119400 | 39.31486400 |
| C | 25.01450900 | 44.62495900 | 39.12193800 |
| N | 26.34787600 | 44.37756600 | 38.53501800 |
| C | 26.56213800 | 43.17161700 | 38.17070600 |
| C | 27.84017500 | 42.74467600 | 37.55860800 |
| C | 28.19879900 | 43.13100300 | 36.27001100 |
| C | 29.40839800 | 42.70686000 | 35.73022000 |
| C | 30.27055000 | 41.91813400 | 36.46656800 |
| C | 29.92158100 | 41.55487600 | 37.77745500 |
| C | 28.71211900 | 41.95578000 | 38.31483800 |
| N | 31.41320400 | 41.37356600 | 35.84457100 |
| C | 32.45008200 | 40.80654300 | 36.52044300 |
| O | 32.80591700 | 41.15891800 | 37.62290200 |
| H | 27.05837700 | 45.09047300 | 38.45237900 |
| H | 21.28632200 | 39.24000500 | 36.38364100 |
| H | 23.33508300 | 40.53214100 | 36.10012400 |
| H | 24.25938600 | 39.90192700 | 40.22991400 |
| H | 22.20510400 | 38.57324100 | 40.49077200 |
| H | 25.97974600 | 40.69630800 | 37.34750000 |
| H | 24.54531000 | 42.90854300 | 40.35213600 |
| H | 23.42859700 | 43.10898300 | 39.02928700 |
| H | 25.13015200 | 45.17411100 | 40.04338800 |
| H | 24.44067100 | 45.22385200 | 38.42791800 |
| H | 28.44710000 | 41.64984000 | 39.30950800 |
| H | 27.53995600 | 43.73493600 | 35.67415100 |
| H | 29.66676600 | 42.98441600 | 34.72448800 |
| H | 30.57134400 | 40.94535900 | 38.36765800 |
| H | 31.33598600 | 41.15056300 | 34.87050100 |
| H | 19.96374700 | 37.95268700 | 37.61126400 |
| H | 32.86158900 | 39.88726100 | 36.07936400 |
| H | 18.89432200 | 36.89111400 | 39.20353300 |



---

MINIMUM S<sub>1</sub> E-2-C1

---

|   |             |             |             |
|---|-------------|-------------|-------------|
| C | 33.01090194 | 39.55385177 | 35.91897225 |
| C | 18.55588060 | 36.71458059 | 39.09886137 |
| C | 19.83697405 | 37.38166481 | 39.51691746 |
| O | 20.24028581 | 37.32957088 | 40.62722491 |
| N | 20.48280180 | 38.03824564 | 38.46575399 |
| C | 21.61118957 | 38.76966856 | 38.42980438 |
| C | 21.95513896 | 39.35454957 | 37.17879078 |
| C | 22.48073278 | 38.96810164 | 39.55846961 |
| C | 23.63142431 | 39.70873885 | 39.39947172 |
| C | 23.97619870 | 40.31099594 | 38.16607188 |
| C | 23.07641809 | 40.09741620 | 37.05382775 |
| C | 25.20601818 | 41.09345442 | 37.97472696 |
| C | 25.41012923 | 42.36269944 | 38.43131700 |
| C | 24.48131949 | 43.21002143 | 39.29524286 |
| C | 25.02960894 | 44.64325981 | 39.11611204 |
| N | 26.34792890 | 44.42063668 | 38.55891014 |
| C | 26.53080362 | 43.14483523 | 38.15717300 |
| C | 27.81725394 | 42.73280604 | 37.55548873 |
| C | 28.19737408 | 43.12131062 | 36.27154329 |
| C | 29.41318990 | 42.70986866 | 35.73295037 |
| C | 30.27282804 | 41.91938515 | 36.46742877 |
| C | 29.91950444 | 41.54978998 | 37.77163727 |
| C | 28.70842784 | 41.95595848 | 38.30521800 |
| N | 31.42108291 | 41.37276930 | 35.84328354 |
| C | 32.45242286 | 40.80797835 | 36.51857014 |
| O | 32.81000895 | 41.15572006 | 37.62361013 |
| H | 27.06244795 | 45.11299947 | 38.48078259 |
| H | 21.27688224 | 39.23842571 | 36.35632761 |
| H | 23.32476750 | 40.54198921 | 36.10851150 |
| H | 24.26879807 | 39.88244715 | 40.24196810 |
| H | 22.19685190 | 38.57642387 | 40.51033675 |
| H | 25.96604616 | 40.64989223 | 37.35583775 |
| H | 24.55782182 | 42.90101004 | 40.33302369 |
| H | 23.43749408 | 43.12581792 | 39.02119086 |
| H | 25.10057717 | 45.17983649 | 40.05211033 |
| H | 24.41760338 | 45.22630797 | 38.43422588 |
| H | 28.44441306 | 41.65505036 | 39.30219217 |
| H | 27.53930755 | 43.72858632 | 35.67809401 |
| H | 29.67253150 | 42.98792202 | 34.72666301 |
| H | 30.57354104 | 40.94686040 | 38.36561374 |
| H | 31.33813439 | 41.14217916 | 34.87263505 |
| H | 19.98498254 | 37.96805885 | 37.60344204 |
| H | 32.86224470 | 39.88767807 | 36.07857460 |
| H | 18.89688500 | 36.89214661 | 39.21014050 |

---

TS S<sub>1</sub> E-2-C1

---

|   |             |             |             |
|---|-------------|-------------|-------------|
| C | 32.98994500 | 39.52714300 | 35.92079800 |
| C | 18.58495500 | 36.74879900 | 39.14275000 |
| C | 19.84876900 | 37.42853700 | 39.58707400 |
| O | 20.22557300 | 37.38182000 | 40.70748400 |
| N | 20.52812200 | 38.07700800 | 38.55361400 |
| C | 21.68509400 | 38.75981200 | 38.57432400 |
| C | 22.14800900 | 39.28352600 | 37.33322500 |
| C | 22.46825000 | 38.95414900 | 39.76291300 |
| C | 23.63750900 | 39.67031700 | 39.67798100 |
| C | 24.11261100 | 40.17908000 | 38.44628600 |
| C | 23.32709900 | 39.93740100 | 37.26658900 |
| C | 25.37901500 | 40.93152200 | 38.35715300 |
| C | 25.41323200 | 42.37650100 | 38.43352000 |
| C | 24.50468300 | 43.24826000 | 39.28588000 |
| C | 25.03098400 | 44.67790000 | 39.00332100 |
| N | 26.19348700 | 44.48590300 | 38.13390600 |
| C | 26.41493200 | 43.14492300 | 37.95781200 |
| C | 27.69399800 | 42.69815700 | 37.35235800 |
| C | 28.04821100 | 42.94907200 | 36.02790300 |
| C | 29.27197100 | 42.50806500 | 35.53123700 |
| C | 30.16394500 | 41.83412100 | 36.34292800 |
| C | 29.82806500 | 41.59682300 | 37.68060400 |
| C | 28.60844400 | 42.02955500 | 38.17318400 |
| N | 31.33374600 | 41.27578000 | 35.77184600 |
| C | 32.37362000 | 40.77289500 | 36.48115300 |
| O | 32.71542100 | 41.16979400 | 37.57464200 |
| H | 27.00468100 | 45.05760100 | 38.27740200 |
| H | 21.53253600 | 39.16790100 | 36.46168100 |
| H | 23.68061300 | 40.31942500 | 36.32753900 |
| H | 24.21046800 | 39.84743700 | 40.56649600 |
| H | 22.09587500 | 38.59836600 | 40.69778000 |
| H | 26.25047400 | 40.34896100 | 38.60302300 |
| H | 24.60078800 | 42.98245100 | 40.33346100 |
| H | 23.44973100 | 43.15542800 | 39.04405400 |
| H | 25.32155000 | 45.18577300 | 39.91450800 |
| H | 24.29073200 | 45.29121100 | 38.50245200 |
| H | 28.36550700 | 41.85220400 | 39.20520200 |
| H | 27.37367400 | 43.47042600 | 35.37499000 |
| H | 29.52457400 | 42.69005800 | 34.50137400 |
| H | 30.50377200 | 41.08576800 | 38.33300500 |
| H | 31.27279700 | 40.99232400 | 34.81258000 |
| H | 20.07480700 | 38.00814400 | 37.66703300 |
| H | 32.82589000 | 39.85874000 | 36.06995500 |
| H | 18.92136000 | 36.92973300 | 39.26102100 |

---

FC STRUCTURE E-2-C2

---

|   |             |             |             |
|---|-------------|-------------|-------------|
| C | 34.02402700 | 40.42924000 | 32.50363200 |
| C | 29.20725600 | 32.92891600 | 40.87904700 |
| C | 29.51913600 | 34.25737400 | 40.26543100 |
| O | 28.68251000 | 35.09806000 | 40.19851600 |
| N | 30.81231000 | 34.40124000 | 39.84121200 |
| C | 31.41032100 | 35.61905400 | 39.47138100 |
| C | 32.50436600 | 35.60365000 | 38.61600600 |
| C | 30.93812100 | 36.84246300 | 39.96172400 |
| C | 31.58424300 | 38.01612200 | 39.61250200 |
| C | 32.67387500 | 38.00918600 | 38.73043500 |
| C | 33.10833300 | 36.77958100 | 38.21931900 |
| C | 33.29241200 | 39.25246300 | 38.30141200 |
| C | 33.59919100 | 40.29605100 | 39.11572700 |
| C | 33.61390900 | 40.37107700 | 40.63395100 |
| C | 34.55402100 | 41.55973400 | 40.91651300 |
| N | 34.70892800 | 42.18990700 | 39.59148300 |
| C | 34.20222200 | 41.51529500 | 38.61932600 |
| C | 34.26146200 | 41.93954800 | 37.21433700 |
| C | 33.07219300 | 41.99640200 | 36.48957800 |
| C | 33.10707200 | 42.29982200 | 35.13568200 |
| C | 34.33433000 | 42.50292800 | 34.51117900 |
| C | 35.51340000 | 42.48101700 | 35.24988000 |
| C | 35.48533400 | 42.20771800 | 36.59701200 |
| N | 34.39607100 | 42.76140900 | 33.11756600 |
| C | 34.29774800 | 41.86486000 | 32.11214000 |
| O | 34.38755400 | 42.21037700 | 30.96181900 |
| H | 35.10650100 | 43.10653100 | 39.45442700 |
| H | 32.88873700 | 34.66014200 | 38.27671500 |
| H | 33.93994600 | 36.74486500 | 37.53795800 |
| H | 31.19086700 | 38.94532400 | 39.97930900 |
| H | 30.06682500 | 36.87726600 | 40.57544300 |
| H | 33.53623100 | 39.34174100 | 37.25839000 |
| H | 33.98129800 | 39.45738900 | 41.08110200 |
| H | 32.63208000 | 40.55446000 | 41.04678900 |
| H | 35.53422900 | 41.26712100 | 41.26739400 |
| H | 34.15213100 | 42.28530300 | 41.60360800 |
| H | 36.40489900 | 42.15758600 | 37.15215000 |
| H | 32.13468900 | 41.83435700 | 36.98475600 |
| H | 32.19917500 | 42.35398700 | 34.56585300 |
| H | 36.44329300 | 42.63180900 | 34.73891100 |
| H | 34.56389800 | 43.70854900 | 32.83769400 |
| H | 31.38479200 | 33.58457900 | 39.81959900 |
| H | 34.09688700 | 40.81137600 | 32.39942400 |
| H | 29.29027300 | 33.28252800 | 40.71571400 |

---

MINIMUM  $S_1$  E-2-C2

---

|   |             |             |             |
|---|-------------|-------------|-------------|
| C | 34.02447817 | 40.43127887 | 32.50333138 |
| C | 29.20600344 | 32.93001558 | 40.88202699 |
| C | 29.51506918 | 34.26400309 | 40.28318626 |
| O | 28.69233947 | 35.10368231 | 40.19864208 |
| N | 30.83235450 | 34.42420326 | 39.83814347 |
| C | 31.40735130 | 35.60248925 | 39.48162759 |
| C | 32.53233087 | 35.58253994 | 38.61692980 |
| C | 30.91353955 | 36.85502381 | 39.96785806 |
| C | 31.55445300 | 38.02156288 | 39.62208526 |
| C | 32.65393617 | 38.01609465 | 38.73276872 |
| C | 33.10763720 | 36.74435121 | 38.22528381 |
| C | 33.27885690 | 39.23706219 | 38.28515663 |
| C | 33.59970372 | 40.31836367 | 39.10600311 |
| C | 33.63262646 | 40.38196563 | 40.62683249 |
| C | 34.57944572 | 41.57606660 | 40.91195254 |
| N | 34.76336731 | 42.20004703 | 39.62284748 |
| C | 34.18277725 | 41.50351507 | 38.61445066 |
| C | 34.25915435 | 41.92157806 | 37.21817388 |
| C | 33.07599975 | 41.99393512 | 36.47999688 |
| C | 33.10761365 | 42.29480527 | 35.12776699 |
| C | 34.33546565 | 42.50164056 | 34.50680286 |
| C | 35.51054672 | 42.48154287 | 35.24746393 |
| C | 35.47953249 | 42.20423133 | 36.59457071 |
| N | 34.39744402 | 42.76073475 | 33.11065331 |
| C | 34.29887948 | 41.86776320 | 32.10973725 |
| O | 34.38819476 | 42.20903085 | 30.95443046 |
| H | 35.08585995 | 43.13702709 | 39.49236627 |
| H | 32.90637250 | 34.63672066 | 38.27943380 |
| H | 33.93742121 | 36.73662522 | 37.54176983 |
| H | 31.17941117 | 38.95666123 | 39.98652154 |
| H | 30.04731738 | 36.88021015 | 40.58837268 |
| H | 33.53770906 | 39.30508189 | 37.24513304 |
| H | 33.99379574 | 39.46782130 | 41.08261647 |
| H | 32.64655431 | 40.56150289 | 41.03826103 |
| H | 35.53450336 | 41.24581178 | 41.30999927 |
| H | 34.15618308 | 42.26880947 | 41.62597500 |
| H | 36.39667571 | 42.16005009 | 37.15374850 |
| H | 32.13973238 | 41.83977979 | 36.98042422 |
| H | 32.19916279 | 42.35628799 | 34.55896334 |
| H | 36.44146731 | 42.63726148 | 34.73841559 |
| H | 34.56373574 | 43.70810423 | 32.83259575 |
| H | 31.38863073 | 33.59417756 | 39.76541303 |
| H | 34.09751894 | 40.81364557 | 32.39856359 |
| H | 29.28827127 | 33.28509944 | 40.72262619 |

---

TS S<sub>1</sub> E-2-C2

---

|   |             |             |             |
|---|-------------|-------------|-------------|
| C | 34.02511900 | 40.43038900 | 32.50714200 |
| C | 29.20011900 | 32.93370800 | 40.88414900 |
| C | 29.45711100 | 34.28190200 | 40.29227300 |
| O | 28.61082900 | 35.10670400 | 40.26512900 |
| N | 30.74405500 | 34.47651700 | 39.80962400 |
| C | 31.29973300 | 35.68021000 | 39.47489100 |
| C | 32.41219400 | 35.66266100 | 38.59857600 |
| C | 30.80832500 | 36.91770800 | 39.97658000 |
| C | 31.47139100 | 38.08395400 | 39.67573700 |
| C | 32.57777000 | 38.08489700 | 38.76965200 |
| C | 32.99054100 | 36.82162100 | 38.21089200 |
| C | 33.31915100 | 39.21839700 | 38.41083900 |
| C | 33.57927500 | 40.41001300 | 39.21869400 |
| C | 33.88516500 | 40.34810400 | 40.70158200 |
| C | 34.50917800 | 41.72463600 | 40.97839400 |
| N | 34.90403900 | 42.19423700 | 39.65834200 |
| C | 34.18831300 | 41.56108200 | 38.69242300 |
| C | 34.24979100 | 41.95062600 | 37.28490200 |
| C | 33.07558300 | 41.94460600 | 36.52584000 |
| C | 33.11187500 | 42.23387600 | 35.16879200 |
| C | 34.33612500 | 42.48861300 | 34.55350200 |
| C | 35.50042600 | 42.53607800 | 35.31637900 |
| C | 35.46327300 | 42.28445200 | 36.66755000 |
| N | 34.40607000 | 42.75000100 | 33.15689200 |
| C | 34.30924300 | 41.87009900 | 32.13855500 |
| O | 34.41252300 | 42.22849800 | 30.99104000 |
| H | 35.13723500 | 43.16083100 | 39.52109600 |
| H | 32.78869900 | 34.71546000 | 38.26069300 |
| H | 33.81494300 | 36.80988200 | 37.51932000 |
| H | 31.11056700 | 39.01287300 | 40.07621300 |
| H | 29.93025700 | 36.93524800 | 40.58297000 |
| H | 33.89635200 | 39.13118500 | 37.51429100 |
| H | 34.58748700 | 39.54511400 | 40.92207400 |
| H | 32.99901900 | 40.17597100 | 41.30262300 |
| H | 35.35370100 | 41.69419400 | 41.65287100 |
| H | 33.77561000 | 42.40131900 | 41.39865500 |
| H | 36.37434000 | 42.30360600 | 37.23747300 |
| H | 32.13786400 | 41.76496400 | 37.01574700 |
| H | 32.20757800 | 42.26006700 | 34.59060800 |
| H | 36.43099200 | 42.74002300 | 34.82349300 |
| H | 34.59775600 | 43.69474200 | 32.88475000 |
| H | 31.30049100 | 33.65878100 | 39.66001300 |
| H | 34.10074800 | 40.81361400 | 32.40903100 |
| H | 29.26852600 | 33.29257300 | 40.72660200 |

- (1) Jorgensen, W. L.; Chandrasekhar, J.; Madura, J. D.; Impey, R. W.; Klein, M. L. *J. Chem. Phys.* **1983**, *79*, 926.
- (2) Hornak, V.; Abel, R.; Okur, A.; Strockbine, B.; Roitberg, A.; Simmerling, C. *Proteins: Struct., Funct., Bioinf.* **2006**, *65*, 712.
- (3) Wang, J.; Wolf, R. M.; Caldwell, J. W.; Kollman, P. A.; Case, D. A. *J. Comput. Chem.* **2004**, *25*, 1157.

- (4) Blanco-Lomas, M.; Samanta, S.; Campos, P. J.; Woolley, G. A.; Sampedro, D. J. *Am. Chem. Soc.* **2012**, *134*, 6960.
- (5) Singh, U. C.; Kollman, P. A. *J. Comput. Chem.* **1984**, *5*, 129.
- (6) Besler, B. H.; Merz, K. M., Jr.; Kollman, P. A. *J. Comput. Chem.* **1990**, *11*, 431.
- (7) Becke, A. D. *J. Chem. Phys.* **1993**, *98*, 5648.
- (8) Vreven, T.; Byun, K. S.; Komaromi, I.; Dapprich, S.; Montgomery, J. A., Jr.; Morokuma, K.; Frisch, M. J. *J. Chem. Theory Comput.* **2006**, *2*, 815.
