# Supplementary material for: A biomimetic molecular switch at work: coupling photoisomerization dynamics to peptide structural rearrangement
Source: Royal Society of Chemistry journal article supplement (doi:10.1039/c5cp07599h), 2016-01-01
Supplement: c5cp07599h3.pdf [file c5cp07599h3.pdf]

The file Z1\_50ns.wmv contains a video showing a 50 ns molecular dynamics trajectory of compound **Z-2**, just after *E*-to-*Z* photo-switching: it can be seen how the initial alpha-helix is converted into a stable alpha-hairpin.
